# Supplementary material for: ZnO-decorated SiC@C hybrids with strong electromagnetic absorption
Source: publisher site journal article supplement (doi:10.3762/bjnano.14.47), 2023-05-04
Supplement: Additional file 1 [file 2190-4286-14-47-S1.pdf]

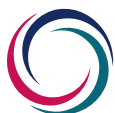

## Supporting Information

for

### **ZnO-decorated SiC@C hybrids with strong electromagnetic absorption**

Liqun Duan, Zhiqian Yang, Yilu Xia, Xiaoqing Dai, Jian'an Wu and Minqian Sun

*Beilstein J. Nanotechnol.* **2023**, *14*, 565–573. [doi:10.3762/bjnano.14.47](https://doi.org/10.3762/bjnano.14.47)

## Additional experimental data

# Experimental

## Pristine materials

Pristine SiC<sub>nw</sub> (diameter: 100–600 nm; length >100 μm; density: 3.21 g/cm<sup>3</sup>; purity: ≈98%) was purchased from XF Nano Materials Tech Co., Ltd. (Nanjing, China).

## Characterization and measurements

The morphology of the SCZ materials was characterized through transmission electron microscopy (TEM) on a FE-HRTEM, Tecnai G2 F20UTwin (FEI, USA) at 200 kV. X-ray photoelectron spectroscopy (XPS) experiments were carried out on a K-Alpha 1063 system (Thermo Fisher Scientific). The X-ray anode was run at 72 W and the high voltage was kept at 12.0 kV. The base pressure of the analyzer chamber was about  $1 \times 10^{-9}$  mbar. A whole spectrum scan (0–1400 eV) and regional scans of all the elements at very high resolution were recorded for each sample. X-ray diffractometry (XRD) was carried out on a Bruker D8 advance (Bruker, Germany). Relative complex permittivity ( $\epsilon_r$ ) and permeability ( $\mu_r$ ) in the 2–18 GHz range were obtained through a vector network analyzer (N5242A PNA-X, Agilent, UK). Uniform mixtures of SCZ samples and wax were pressed into a toroidal shape (outer diameter: 7.00 mm, inner diameter 3.04 mm).

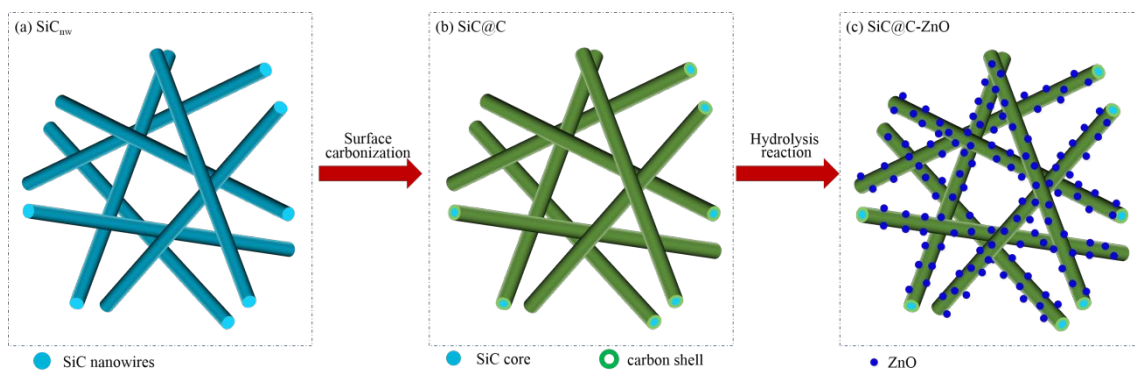

**Figure S1:** Schematic illustration of the fabrication of SCZ hybrids.

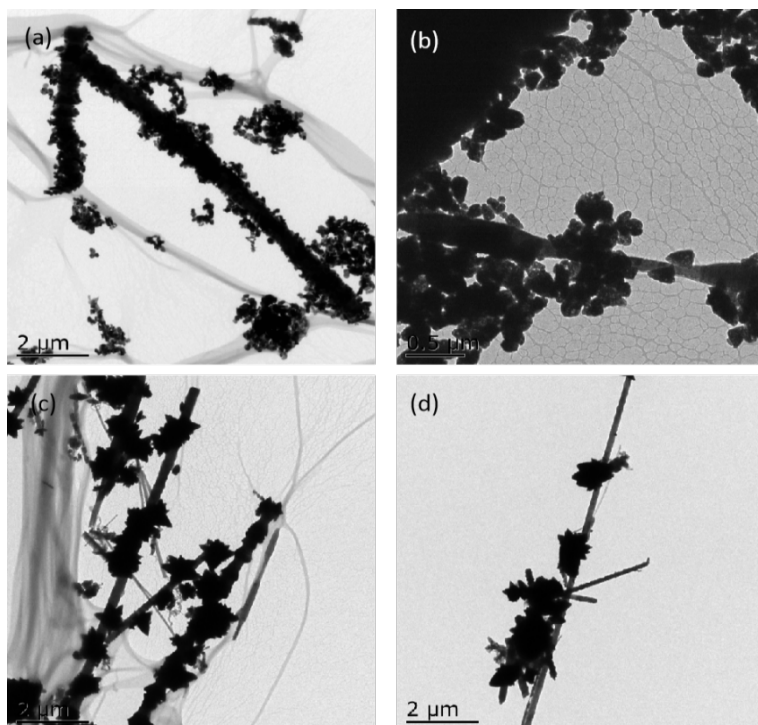

**Figure S2:** TEM images of SCZ samples. (a) SCZ4; (b) SCZ3; (c) SCZ2; (d) SCZ1.

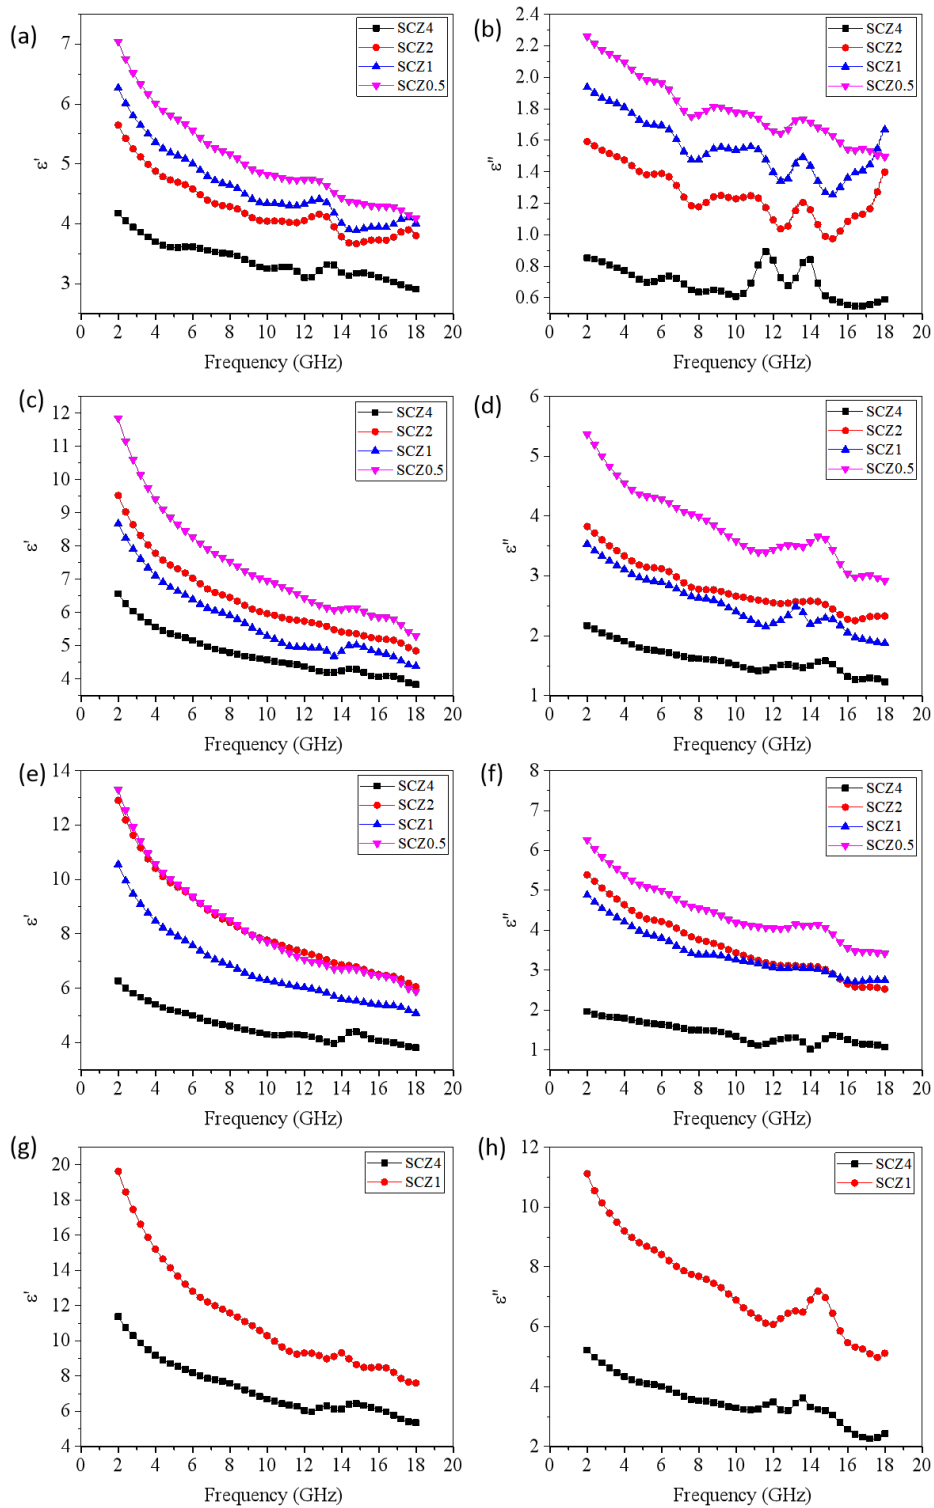

**Figure S3:** Real part (a,c,e,g) and imaginary part (b,d,f,h) of the relative complex permittivity of SCZ samples with different loadings. (a, b) 20 wt %; (c, d) 30 wt %; (e, f) 40 wt %; (g, h) 50 wt %.

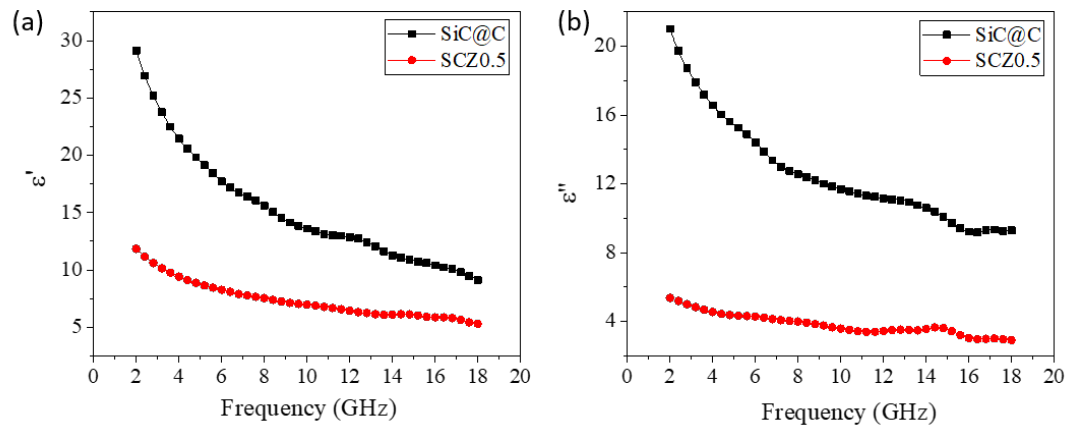

**Figure S4:** Real part (a) and imaginary part (b) of the relative complex permittivity of SCZ0.5 and SiC@C samples.

**Table S1:** The minimum matching thickness of SCZ samples for covering X and Ku bands.

| Samples | Filler load (wt %) | $d_x$ (mm) <sup>a</sup> | $d_{Ku}$ (mm) <sup>b</sup> |
|---------|--------------------|-------------------------|----------------------------|
| SCZ0.5  | 30                 | 2.98                    | 2.15                       |
| SCZ0.5  | 40                 | 2.85                    | 2.09                       |
| SCZ1    | 30                 | 3.47                    | 2.44                       |
| SCZ1    | 40                 | 3.16                    | 2.88                       |
| SCZ2    | 30                 | 3.28                    | 2.35                       |
| SCZ2    | 35                 | —                       | 2.2                        |
| SCZ2    | 40                 | 2.82                    | —                          |
| SCZ4    | 50                 | 3.03                    | 2.08                       |

<sup>a</sup> $d_x$  and  $d_{Ku}$  indicates the minimum matching thickness for the X and Ku bands, respectively.
